# Supplementary material
Source: publisher site journal article supplement (https://www.dovepress.com/get_supplementary_file.php?f=251499.docx)
Supplement: Supplementary file 1 [file get_supplementary_file.php]

Supplementary Table 1. List of studies identified in the systematic review (Figure 1). Articles are listed in alphabetical order.

| **Article** | **N of participants** | **Type of study** | **Prevalence of OCD/OCB**** | **Main findings** |
| --- | --- | --- | --- | --- |
| Alsbrook et al. 36 | 85 | Factor analysis | - | Four significant factors were identified: 1) aggressive phenomena (e.g., kicking, temper fits, argumentativeness), 2) purely motor and phonic tic symptoms, 3) compulsive phenomena (e.g., touching of others or objects, repetitive speech, throat clearing), and 4) tapping and absence of grunting. |
| Anholt et al. 105 | 117 | Prospective cohort | - | Dysfunctional beliefs have no discriminative power with respect to OCD with or without tic patients |
| Benatti et al. 106 | 313 | Prospective cohort | - | 1)Patients with OCTD vs with OCD showed a significantly higher rate of SA with no differences in SI.  2) Patients with OCTD-SA showed higher rates of other psychiatric comorbidities and positive psychiatric family histor |
| Bhikram et al. 107 | 60 | Neuroimaging | 50% | Areas previously reported to be involved in OCD, as well as areas not typically implicated in OCD, suggesting that the neurobiological profile of TS+OCD is intermediate to pure TS and pure OCD |
| Bloch et al. 14 | 46 | Longitudinal | 37% | OCB in children with TS became more severe at a later age and were more likely to persist than tic symptoms. |
| Cath et al. 58 | 92 | Prospective, comparative | - | 1)Both the TS and OCD study groups showed higher scores than control subjects on rating scales measuring depression, OCB and anxiety.  2) In TS, Y-BOCS severity scores and trait anxiety were lower than in the OCD groups.  3)Aggressive repetitive thoughts, contamination worries and washing behaviors were reported more frequently by tic-free OCD, while mental play, echophenomena, touching and (self)-injurious behaviors were reported more frequently by TS.  4)OCD individuals with tics were intermediate, but closer to tic-free OCD. |
| Cath et al. 108 | 82 | Prospective, comparative | - | 1)TS + OCD subjects reported more overall TS-related impulsions than OCD-tic subjects, i.e., more mental play, echophenomena, and touching behaviors but similar frequencies of typical obsessive-compulsive behaviors.  2) TS + OCD subjects exhibited more overall repetitive behaviors than TS-OCD subjects  3) The distribution of symptoms is similar in TS with and without OCD, and differs from tic-free OCD |
| Cath et al. 109 | 68 | Prospective, comparative | - | 1)Across the study groups, obsessions were experienced as more severe than (TS) impulsions and compulsions  2) Patients with both TS and OCD reported more symptomatic TS related impulsions, such as mental play, echophenomena, and impulsive or self-injurious behaviors; less overall symptomatic obsessions; and less symptomatic washing than patients with pure OCD |
| Cath et al. 110 | 77 | Prospective, comparative | - | 1)Platelet MAO activity was elevated in tic-free OCD subjects when compared to tic + OCD, TS without OCD and controls.  2) Whole blood 5-HT was lowered in tic + OCD patients in comparison to TS without OCD and tic-free OCD subjects  3) The biochemical data of this study suggest that in tic + OCD and in tic-free OCD patients, 5-HT dysregulations play a role, but not necessarily in pure TS  4) Serotonergic dysregulations within tic + OCD and tic-free OCD patients are distinct, suggesting differences in underlying pathophysiology. |
| Cavanna et al. 40 | 639 | Principal component factor analysis | 36.4% | 1)Three factors were identified: (a) complex motor tics and echo-paliphenomena; (b) ADHD symptoms plus aggressive behaviours; and (c) complex vocal tics and coprophenomena.  2) OCB loaded significantly on the first two factors.  3)The three factors accounted for 48.5% of the total symptomatic variance. |
| Cheung et al. 111 | 333 | Longitudinal | 63% (OCD/OCB) | Compared with patients with nonmalignant TS, those with malignant TS were significantly more likely to have a personal history of obsessive compulsive behavior/disorder (OCB/OCD), complex phonic tics, coprolalia, copropraxia, SIB, mood disorder, suicidal ideation, and poor response to medications |
| Coffey et al. 112 | 61 | Prospective, comparative | - | TS + OCD is a more severe disorder than TS and OCD and may be more etiologically linked to TS than to OCD |
| Darrow et al. 113 | 3494 | Heretability study | - | 1)Two cross-disorder symptom-based phenotypes were identified: symmetry (symmetry, evening up, checking obsessions; ordering, arranging, counting, writing-rewriting compulsions, repetitive writing tics) and disinhibition (uttering syllables/words, echolalia/palilalia, coprolalia/copropraxia and obsessive urges to offend/mutilate/be destructive).  2)Polygenic risk scores derived from a TS genome-wide association study (GWAS) were associated with symmetry (p= 0.02), while risk scores derived from an OCD GWAS were not.  3)OCD polygenic risk scores were associated with disinhibition (p =0.03), while TS and ADHD risk scores were not. |
| Davis et al. 114 | 13271 | GCTA | - | There is some genetic overlap between TS and OCD, but the two disorders have distinct genetic architectures. |
| de Groot et al. 115 | 58 | Prospective comparative | - | 1) Subjects with OCD alone were characterized by contamination obsessions and cleaning compulsions.  2) TS subjects had more somatic, sexual and symmetry obsessions and more checking, counting and touching compulsions, independent of OCB and tic severity |
| Diniz et al. 116 | 159 | Prospective, comparative |  | 1) OCD+CTD patients were similar to OCD+TS patients regarding the frequency of intrusive sounds, repeating behaviors, counting and tic-like compulsions (in both cases more frequent than in pure OCD).  2) For age at OCB onset, sensory phenomena score, number of comorbidities, frequency of somatic obsessions, bodily sensations and just-right perceptions, OCD+CTD patients tended to be in between the other two groups. |
| Eapen et al. 117 | 32 | Prospective, comparative | - | Sexual and violent obsessions were morecommon in the TS group, and concern for contamination and fear of something going wrong/becoming ill/or something bad happening were moreprevalent in the OCD group. |
| Eapen et al. 37 | 91 | Prospective | 58% (OCD/OCB) | 1)OCB were positively correlated with presence of ADHD and SIB.  2)Principal components factor analysis yielded two factors, ‘obsessionality’ and ‘anxiety/depression’, which accounted for 72% of the variance. |
| Grados et al. 118 | 796 | Prospective | - | Tic disorders constitute an alternate expression of the familial OCD phenotype |
| Grados et al. 119 | 952 | Latent class analysis | 46% | 1)In this large sample of TS sib pairs and their parents, three TS-affected groups were identified—TS + OCD/OCB, TS + OCD, and TS + OCD + ADHD—in addition to a minimally affected class (I) and a small chronic tics + OCD class.  2)A preponderance of males and younger age at onset was found in more comorbidly affected classes. Only the TS + OCD + ADHD class was highly heritable. |
| Groth et al. 12 | 314 at T1 and 227 at T2 | Longitudinal | 39.0% at T1, 26.8% at T2 | 1)Childhood clinical factors, represented by 4 binary clinical outcomes, were selected as possible predictors of the clinical course of tics and comorbidities in early adulthood; these were tic severity and diagnoses of OCD, ADHD, and emotional disorders  2)The strongest predictors of high tic scores, OCD, or ADHD diagnoses in early adulthood were the corresponding tic, OCD, and ADHD severity scores (per scale point) in childhood  3)OCD score T1 was the strongest predictor of OCD at T2 |
| Hebebrand et al. 120 | 87 | Prospective | - | Both OCD and OCB were frequently associated with TS in index patients |
| Hirschritt et al. 5 | 1374 TS/ 1142  unaffected family members | Cross-sectional | 72.1% of the individuals met the criteria for OCD or ADHD | 1)High rates of mood disorders among participants with TS (29.8%) may be accounted for by comorbid OCD  2) Genetic correlations between TS and mood, anxiety, and disruptive behavior disorders, may be accounted for by ADHD and, for mood disorders, by OCD. |
| Hirschritt et al. 27 | 3494 | EFA, LCA | - | Symmetry/exactness, aggressive urges, fear-of-harm, and hoarding show complex genetic relationships with TS, OCD, and ADHD, and, rather than being specific subtypes of OCD. |
| Holzer et al. 121 | 70 | Prospective, comparative | - | Compared to their counterparts without tics, OCD patients with tics had more touching, tapping, rubbing, blinking and staring rituals, and fewer cleaning rituals, but did not differ on obsessions. |
| Huisman van Dijk et al. 41 | 596 | A cross- disorder symptom analysis | 35.9% | Five factor structure was determined: tic/aggression/symmetry; OCB/compulsive tics/ numbers and patterns; ADHD symptoms; autism symptoms; and hoarding/inattention symptoms. |
| Isaacs et al. 122 | 34 | Prospective, comparative | 52.9% | Sensory hypersensitivity is prominent in adults with tic disorder and is independently associated with obsessive-compulsive symptom severity |
| [Jaisoorya](https://pubmed.ncbi.nlm.nih.gov/?term=Jaisoorya+TS&cauthor_id=18704026)et al. 123 | 191 | Prospective, comparative | - | 1)Subjects having OCD with tics tended to be males, and had an earlier onset of illness  2)They had more of symmetry/aggressive and religious obsessions, and cleaning, ordering/arranging, hoarding, and repeating compulsions and were associated with trichotillomania and hypochondraisis  3) An early age of onset, male gender, aggressive obsessions, cleaning 706compulsions, and trichotillomania were signifi-cantly associated with tic-related OCD. |
| Lebowitz et al. 124 | 158 | Prospective, comparative | 38.6 % | 1)TS and OCD wascharacterized by more severe tics, increased levels of depressive and anxious symptoms, heightened psychosocial stress and poorer global functioning  2) Subjects with comorbid GTS and OCD had more internalizing disorders than those without OCD, while those with comorbid ADHD were more likely to meet criteria for oppositional defiant disorder  3) TS with OCD is a more severe subtype of TS than TS without OCD. |
| Leckman et al. 34 | 177 | Cross-sectional | - | 1)Patients with tic-related OCD reported more OCB, including more aggressive, religious, and sexual obsessions as well as checking, counting, ordering, touching, and boarding compulsions than did patients with non-tic-related OCD.  2) TS+OCD vs pure OCD patients did not differ with regard to the presence of "just right" phenomena or symptoms of psychasthenia.  3) "Just right" phenomena and symptoms of psychasthenia, however, were both found to be associated with the current severity of OCB. |
| Lin et al. 125 | 64 | Longitudinal | - | 1)The severity of tic and OCB displayed a high degree of intrasubject variability.  2)Exacerbation thresholds, which incorporated the change score from the previous month and the current symptom score, provided the best agreement with those of expert clinicians.  3)When both tic and OCB were present, they showed a significant degree of covariation. |
| Liu et a. 126 | 1597 | Genetic | - | The involvement of the BDNF Val66Met polymorphism as a common genetic susceptibility for OCD and TS in the Chinese Han population, showing specific gender trends. |
| Mansueto et al. 127 | 3 | Case series | - | Introduction of the term Tourettic OCD. |
| Mathews et al. 128 | 1174 | Heritability analysis | 30.9% | 1)OCD and ADHD were highly heritable in TS families.  2)There were significant genetic correlations between TS and OCD and between OCD and ADHD, but not between TS and ADHD.  3)Parental OCD + ADHD was associated with offspring OCD + ADHD. |
| Mathews et al. 38 | 133 | Cluster analysis | - | 1) Cluster analysis identified two distinct groups in each sample, those with predominantly simple tics (cluster 1), and those with multiple complex tics (cluster 2).  2) Membership in cluster 2 was correlated with increased tic severity, global impairment, medication treatment, and presence of comorbid obsessive-compulsive symptoms in both samples, and with family history of tics, lower verbal IQ, earlier age of onset, and comorbid obsessive-compulsive disorder and attention-deficit/hyperactivity disorder in the AS sample. |
| McGrath et al. 129 | 4488 | Cross-disorder genetic study | - | 1)Several converging lines of evidence implicate 16p13.11 deletions in OCD, with weaker evidence for a role in TS.  2)The trend toward increased overall neurodevelopmental CNV burden in TS and OCD suggests that deletions previously associated with other neurodevelopmental disorders may also contribute to these phenotypes. |
| Miguel et al. 46 | 32 | Prospective, comparative | - | 1)Intentional repetitive behaviors in OCD differ from those in TS and are associated with cognitive and autonomic phenomena.  2) Sensory phenomena preceded intentional repetitive behaviors in TS but not in OCD patients. |
| Miguel et al. 130 | 61 | Prospective, comparative | - | 1) More cognitions and autonomic anxiety and fewer sensory phenomena were reported in OCD than in GTS.  2) Like the TS group, the OCD plus TS group reported more sensory phenomena and fewer cognitions than the OCD group. |
| [Müller](https://pubmed.ncbi.nlm.nih.gov/?term=M%C3%BCller+N&cauthor_id=9194204) et al. 131 | 112 | Cross-sectional | - | 1) On most subscales (especially checking, ordering, and counting/touching), TS patients scored higher than controls.  2) Differences between OCD patients and TS patients were evident on the MOCI subscales 'Checking' and 'Slowness/Repetition' as well as on the MOCI total score and on the HZI subscales 'Cleaning' and 'Obsessive Thoughts'.  3)On these scales, TS patients reported fewer symptoms than OCD patients. |
| Nagy et al. 132 | 137 | Retrospective | 10% | Lower rates of OCD than in other samples |
| Neal et al. 52 | 71 | Prospective | 59% | 1)The vast majority of patients reported at least one NJRE.  2)Patients diagnosed with TS and co-morbid OCD/OCB reported a significantly higher number of NJREs compared to TS patients without OCD/OCB. |
| O’Rourke et al. 133 | 931 | Familial association study | - | TS, ADHD, and OCD symptoms have overlapping neurobiology when occurring in families of TS and/or ADHD probands. |
| Pauls et al. 134 | 154 | Cross-sectional | 19% | The frequency of OCD without TS or CTD among first-degree relatives was significantly elevated in families of both TS + OCD and TS-OCD probands, suggesting that some forms of OCD may represent an alternative expression of the factors responsible for TS and/or CTD |
| Petter et al. 135 | 26 | Cross-sectional | - | 1)There are subtle but definite differences in symptomatology of subjects with pure OCD compared to those with OCD and TS consistent with putative differences in pathophysiology between the 2 groups, i.e., abnormalities in the serotonergic system in OCD patients and serotonergic and dopaminergic abnormalities in those with OCD and TS.  2)These observations may be consistent with genetic heterogeneity within both OCD and TS. |
| Pollak et al. 136 | 180 | Retrospective | - | 1)In the TS group, externalizing behaviors were predicted by tic severity, inattention, and hyperactivity/impulsivity but not by OCD symptoms, whereas internalizing behaviors were predicted by inattention and OCD symptoms but not by tic severity or hyperactivity/impulsivity.  2)Comparison among different clinical groups revealed main effects of TS and ADHD on both externalizing and internalizing behaviors. |
| Pringsheim et al. 137 | 71 | Prospective | 40.8% | 1)Children with TS+ADHD+/-OCD experience impairment in all aspects of psychosocial health.  2)For children with TS only, psychosocial health was not different from that of the normative population in the majority of domains tested. |
| Rankins et al. 138 | 42 | Cross-sectional | - | Findings implicate possible fronto-striatal dysfunction, are consistent with previously reported inhibitory deficits in TS and OCD, and support the theory that comorbid TS+OCD is more closely linked to pure TS than OCD. |
| Rizzo et al. 139 | 100 | Retrospective | 44% | 1)Pure TS has quite a good long-term clinical course.  2) By contrast, those who presented comorbid condition at the onset showed a more severe prognosis. |
| Robertson et al. 39 | 85 | Principal component factor analysis | - | Three significant factors resulted from our analysis, accounting for approximately 42% of the symptomatic variance: Factor 1 (predominantly 'pure tics'), Factor 2 (predominantly ADHDand aggressive behaviours') and Factor 3 (predominantly 'depression-anxiety-OCB and SIB). |
| Sambrani et al. 1 | 1032 | Retrospective | 10%/68% (OCD/OCB) | 1)The most often reported OCB was a “not just right experience” [in 575 (55.9%) patients across the entire sample].  2) Tic severity is associated with the presence of PU, copro-, echo-, and paliphenomena and the number of comorbidities, but not age at tic onset; it is higher in patients with comorbid OCD than in patients with comorbid ADHD |
| Santangelo et al. 140 | 92 | Retrospective | 37% | 1)Males and females tend to experience different kinds of symptoms at onset.  2)However, the overall experience of TS appears to be similar for both groups.  3)Perinatal brain injury is implicated in the etiology of TS in some boys. 4)Early brain injury may cause or exacerbate the development of OCD in some TS sufferers. |
| Tikoo et al. 141 | 31 | Neuroimaging | - | Tic severity negatively correlated with FC in CBN and FPN in the TS group, while the compulsiveness scores positively correlated with the same two networks in OCD patients. |
| Toros et al. 142 | 28 | Retrospective | 75% | The results of the study suggest that there are several common pathologies in the etiology of GTS, OCD, ADHD because of the high comorbidity present between these disorders |
| Trillini et al. 143 | 50 | Prospective | 28% | 1)Personality traits were more common in patients with comorbid OCD and depression, while comorbid ADHD had no influence.  2)These findings, therefore, corroborate the hypothesis that TS plus OCD represents a more severe subtype of TS, and support the assumption that OCD and depression, but not ADHD, are part of the TS spectrum |
| Wanderer et al. 144 | 5060 | Cross-sectional | 19.3% | 1)Children and adolescents with TS + OCD showed higher rates of comorbid disorders compared with those with TS - OCD.  2)This underlines the necessity for a comprehensive assessment of additional comorbidities even if the 2 disorders (TS + OCD) have already been diagnosed. |
| Worbe et al. 60 | 166 | Prospective cohort | 64.4% (RB) | The results confirm the phenomenological heterogeneity of RB in TS patients and allows to distinguish two types: tic-like behaviours which are very likely an integral part of TS; and OCD-like behaviours, which can be considered as a comorbid condition of TS and were correlated with higher score of complex tics, neuroleptic and SSRIs treatment frequency and less successful socio-professional adaptation. |
| Yu et al. 31 | 8390 | Cross-disorder GWAS | - | 1)No significant polygenic signal was detected across the TS and OCD.  2) OCD polygenic signal was significantly attenuated when cases with both OCD and co-occurring GTS/CTD were included in the analysis. |

N – number of participants (both patients and controls), TS – Tourette syndrome, OCD – obsessive-compulsive disorder, OCB – obsessive-compulsive behaviors, GWAS – genome-wide association study, CTD – chronic tic disorder, ADHD – attention deficit hyperactivity disorder, T1 – baseline, T2 – follow-up, EFA - exploratory factor analysis, LCA - latent class analysis, ** - prevalence in group of GTS patients is reported, AS – Ashkenazi Jews, CNV – copy number variants, MOCI- the Maudsley obsessive-compulsive inventory, HZI- Hamburg obsessive-compulsive inventory, NJRE- not just right experiences; PU – premonitory urge; FC – functional connectivity, CBN – cerebellum, RB – repetitive behavior, OCTD – obsessive-compulsive and tic disorders, SA – suicide attempt, Y-BOCS-the Yale-Brown Obsessive Compulsive Scale, MAO – monoamine oxidase, 5-HT - 5-hydroxytryptamine, SIB –self-injurious behavior, BDNF – brain-derived neurotrophic factor, SSRI - selective serotonin reuptake inhibitor
